# 1 **A Universal Temperature-Dependence of Mutational Fitness Effects**

2 *David Berger<sup>1\*</sup>, Josefine Stångberg<sup>1</sup>, Julian Baur<sup>1</sup> & Richard J. Walters<sup>2</sup>.*

3

4 1. Department of Ecology and Genetics, Evolutionary Biology Centre, Uppsala University. Norbyvägen  
5 18D, 75236 Uppsala, Sverige.

6 2. School of Biological Sciences, University of Reading. Whiteknights, Reading, RG6 6BX, United  
7 Kingdom

8

9

10 \* Corresponding author: David Berger

11 Email: [David.berger@ebc.uu.se](mailto:David.berger@ebc.uu.se)

12 Telephone: +46 18 4712662

13

14 **Short title:** Elevated temperature increases the strength of selection

15

16 **Key words:** temperature, environment, adaptation, selection, mutation, biodiversity, climate  
17 change, enzyme-kinetics, protein stability

18

19 **Data accessibility:** <http://dx.doi.org/10.5061/dryad.6dd04>

20

21

## 22 **INTRODUCTORY PARAGRAPH**

23 Natural environments are constantly changing so organisms must also change to persist.  
24 Whether they can do so ultimately depends upon the reservoir of raw genetic material  
25 available for evolution, and the efficacy by which natural selection discriminates among this  
26 variation to favour the survival of the fittest. We apply a biophysical model of protein  
27 evolution to demonstrate that rising global temperatures are expected to intensify natural  
28 selection systematically throughout the genome by increasing the effects of sequence  
29 variation on protein phenotypes. Furthermore, warm and cold adapted genotypes are  
30 expected to show similar temperature-dependent increases in selection. We tested these  
31 predictions by i) estimating selection on induced mutations in seed beetles adapted to either  
32 ancestral or warm temperature, and ii) calculating 100 paired selection estimates on de novo  
33 mutations from the literature in a diverse set of unicellular and multicellular ectothermic  
34 organisms. We show that environmental stress *per se* generally does not increase the  
35 strength of selection on new mutations. However, elevated temperature systematically  
36 increased selection on genome-wide polymorphism. Our model and the data suggest that  
37 this increase corresponds to a doubling of genome-wide selection for a predicted 2-4°C  
38 climate warming scenario in organism living at temperatures close to their thermal  
39 optimum. These results have fundamental implications for global patterns of genetic  
40 diversity and the rate and repeatability of evolution under climate change.

41 The strength of natural selection impacts on a range of evolutionary processes, including  
42 rates of adaptation<sup>1,2</sup>, the maintenance of genetic variation<sup>3,4</sup> and extinction risk<sup>5,6</sup>.  
43 However, surprisingly little is known about whether certain types of environments  
44 systematically impose stronger selection pressures than others<sup>7-9</sup>. In Sewell Wright's (1932)  
45 original fitness landscape metaphor the strength of selection can be viewed as the steepness  
46 of the gradient linking adaptive peaks and valleys across allele frequency space. This once  
47 static view of the fitness landscape has been superseded by a more dynamic landscape, in  
48 which the fitness surface itself responds to both environmental and mutational input<sup>9-11</sup>.  
49 Mapping of the biochemical basis of developmental constraints and the environment's  
50 influence on phenotype is therefore of paramount importance to understanding why certain  
51 evolutionary trajectories are favoured over others<sup>12-16</sup>, and how evolution can be repeatable  
52 despite mutation being considered as an inherently random process<sup>17-20</sup>. Indeed, such  
53 information will ultimately be necessary to predict species adaptability and persistence  
54 under environmental change.

55

56 Environmental change should increase the strength of directional selection on traits  
57 underlying local adaptation. However, the fitness consequences associated with  
58 maladaptation in such key traits may be relatively small compared to the variance in fitness  
59 attributed to segregating polymorphisms across the entire genome<sup>5,21</sup>. This reservoir of  
60 genetic variation is expected to have a fundamental impact on species' adaptability and  
61 extinction risk<sup>6,22</sup>, but how the environment influences the expression and consequences of  
62 this genetic variation remains poorly understood<sup>7,23-25</sup>. For example, it is sometimes argued  
63 that fitness effects of sequence variation are magnified in new environments due to  
64 compromised phenotypic robustness under novel environmental conditions<sup>26-30</sup>. Yet, others

65 have argued that environmental change is bound to have idiosyncratic effects on the mean  
66 strength of selection on genome-wide polymorphism<sup>23,24</sup>. These somewhat conflicting  
67 predictions suggest that only by understanding the mechanistic basis for how environments  
68 mould the effects of sequence variation will it be possible to fully understand the potential  
69 for, and limits to, adaptation in changing environments.

70

71 Here we demonstrate how considerations of underlying biophysical constraints on protein  
72 function can lead to fundamental insights about how climate change and regional  
73 temperatures affect the strength of selection on sequence variation in ectothermic  
74 organisms. The laws of thermodynamics pose a fundamental constraint on protein folding  
75 and enzymatic reactions<sup>31-36</sup>, resulting in a universal temperature-dependence of organismal  
76 behaviour, life-history and fitness<sup>37-42</sup>. By applying an existing biophysical model of enzyme  
77 kinetics we first demonstrate how elevated temperatures cause a drastic increase in the  
78 fitness effects of de novo mutation over the biologically relevant temperature range.  
79 Second, we show that while increased protein stability is predicted to offer robustness to  
80 both temperature and mutational perturbation, warm and cold adapted taxa are expected  
81 to show similar temperature-dependent increases in selection when occupying their  
82 respective thermal niches in nature. The model thus predicts that climate warming will cause  
83 a universal increase in genome-wide selection in cold blooded organisms.

84

85 We test these predictions by first measuring selection on randomly induced mutations at  
86 benign and elevated temperature in replicate experimental evolution lines of the seed  
87 beetle, *Callosobruchus maculatus*, adapted to either ancestral or warm temperature.  
88 Second, we collate and analyse 100 published paired estimates of selection coefficients

89 against genome-wide de novo mutations in benign versus stressful environments in a diverse  
90 set of unicellular and multicellular organisms. Our experimental data and meta-analysis  
91 demonstrate that environmental stress *per se* does not affect the mean strength of selection  
92 on de novo mutations, but provide unequivocal support for the prediction that elevated  
93 temperature leads to a universal increase in genome-wide selection and genetic variance in  
94 fitness. These results have implications for global patterns of genetic diversity and suggest  
95 that evolution will proceed at an ever accelerating rate under continued climate change.

96

## 97 **RESULTS**

### 98 **Enzyme kinetics theory predicts temperature-dependence of mutational effects**

99 Fitness of cold blooded organisms shows a well-characterised relationship with temperature  
100 that closely mirrors the thermodynamic performance of a rate-limiting enzyme<sup>37,43</sup> (Fig 1a).  
101 This close relationship reflects the fact that biological rates are ultimately governed at the  
102 biochemical level by the enzymatic reaction rate,  $r$ :

103

$$104 \quad r = r_0 e^{-\Delta H/RT}, \quad (\text{Eq. 1})$$

105

106 where  $r_0$  is a rate-specific constant,  $\Delta H$  is the enthalpy of activation energy of the enzymatic  
107 reaction ( $\text{kcal mol}^{-1} \text{K}^{-1}$ ),  $R$  is the universal gas constant ( $0.002 \text{ kcal mol}^{-1}$ ) and  $T$  is  
108 temperature measured in degrees Kelvin<sup>44</sup>. Equation (1) thus describes an exponential  
109 increase in reaction rate kinetics, where a higher value of  $\Delta H$  results in a lower reaction rate  
110 at a given temperature, as observed in warm-adapted species<sup>31</sup>.

111

112 The decline in biological rate that occurs at temperatures exceeding the organism's thermal  
113 optimum (Fig. 1a) is attributed to a reduction in the proportion of functional enzyme  
114 available at high temperature due to protein misfolding<sup>31-36</sup>. This temperature-dependence  
115 of protein folding is described as a function of the Gibbs free energy,  $\Delta G$ , which is a measure  
116 of protein stability<sup>34</sup>:

117

$$118 \quad \text{Pr}(\text{active}) = 1 / (1 + e^{\Delta G(T)/RT}). \quad (\text{Eq. 2})$$

119

120 The Gibbs free energy itself comprises both an enthalpy term ( $\Delta H_G$ ) and a temperature-  
121 dependent entropy term ( $\Delta S$ ) and is equal to:  $\Delta G = \Delta H_G + T\Delta S$ <sup>45</sup>. At benign temperature  
122 most natural proteins occur in the native active state and the value of the Gibbs free energy  
123 of folding is negative (mean  $\Delta G_{T=298} \approx -7 \text{ kcal mol}^{-1}$ ,<sup>34,46</sup>). From equation (2) it is clear that  
124 as temperatures increase the Gibbs free energy becomes less negative, reducing the  
125 proportion of active protein. Following Chen and Shakhnovic (2010), the reaction rate  
126 kinetics of equation (1) can be combined with the protein folding of equation (2) to derive a  
127 fitness function (Fig. 1a) to provide a theoretical framework to investigate the consequences  
128 of mutation in a metabolic pathway consisting of  $\Gamma$  rate-determining proteins<sup>47</sup>:

129

$$130 \quad \omega(\Delta H, \Delta G, T, \Gamma) \propto r_0 \frac{e^{-\Delta H/RT}}{\prod_{i=1}^{\Gamma} (1 + e^{\Delta G(T)_i/RT})} \quad (\text{Eq. 3})$$

131

132 Here we use equation (3) as the basis to derive predictions of the effects of temperature on  
133 the strength of selection on de novo mutations.

134 Firstly let us consider the effect of a possible mutation that impacts the catalytic rate of the  
135 enzyme by introducing a term to denote a mutational change in the enthalpy of activation  
136 energy ( $\Delta\Delta H$ ) in equations 1 and 3:

137

$$138 \quad \omega^*(\Delta\Delta H, T) \propto r_0 \frac{e^{-(\Delta H + \Delta\Delta H)/RT}}{\prod_{i=1}^I (1 + e^{\Delta G(T)_i/RT})}. \quad (\text{Eq. 4})$$

139

140 Little is known about the size of such mutational effects, but inspection of equation 4 reveals  
141 that the mean selection coefficient against such de novo mutations is expected to remain  
142 largely unaffected by a change in temperature<sup>45</sup> (Fig. 1c).

143

144 The introduction of a mutational change in Gibbs free energy,  $\Delta\Delta G$ , into equations (4), is in  
145 contrast expected to disproportionately impact protein fitness at higher temperatures:

146

$$147 \quad \omega^*(\Delta\Delta H, \Delta\Delta G, T) \propto r_0 \frac{e^{-(\Delta H + \Delta\Delta H)/RT}}{\prod_{i=1}^I (1 + e^{(\Delta G(T)_i + \Delta\Delta G_i)/RT})}. \quad (\text{Eq. 5})$$

148

149 The majority of de novo mutations are expected to decrease fitness by destabilising protein  
150 structure since natural selection has led to inherently stable protein configurations<sup>32–34,48</sup>.

151 The net impact of a single mutation on the free energy of folding has been estimated to

152  $\Delta\Delta G \approx +0.9 \text{ kcal mol}^{-1}$  (SD = 1.7)<sup>35,49,50</sup>, a value found to be more or less independent of the

153 stability of the targeted protein (i.e. the original  $\Delta G$  value)<sup>46</sup>. Note from equation (2) and (5)

154 how mutation and temperature have synergistic effects on biological rate given their

155 additive effects on  $\Delta G$ . Indeed, on the basis that  $\Delta S \approx -0.25 \text{ kcal mol}^{-1}$ <sup>47</sup>, the net impact of

156 a mean mutational effect of +0.9  $\Delta\Delta G$  on protein stability is equivalent to a 3.6°C rise in

157 temperature. To examine the consequences of this synergism for the temperature  
158 dependence of mutational fitness effects, we calculated the mean selection coefficient  
159 against a de novo mutation across temperature as:

160

$$161 \quad s(T) = 1 - \omega_T^*/\omega_T \quad (\text{Eq. 6})$$

162

163 where  $\omega_T^*$  and  $\omega_T$  is fitness of the mutant and the wildtype at temperature T. If we assume  
164 that fitness is multiplicative, when equations (3) and (5) are substituted into equation (6) we  
165 can yield the following simple expression for selection against a single mutation ( $\Delta\Delta G$ ) in a  
166 protein with a given stability ( $\Delta G$ ):

167

$$168 \quad s(T) = 1 - \omega_T^*/\omega_T = 1 - \theta \frac{1 + e^{\Delta G(T)/RT}}{1 + e^{(\Delta G(T) + \Delta\Delta G)/RT}}. \quad (\text{Eq. 7})$$

169

170 Where  $\theta$  is the relative catalytic performance of the mutant (i.e.  
171  $r_0 e^{-(\Delta H + \Delta\Delta H)/RT} / (r_0 e^{-\Delta H/RT})$ ), which remains largely unchanged over the ecologically  
172 relevant temperature range (Fig. 1c).

173

174 We applied equation (7) in numerical simulations to calculate the expected mean selection  
175 coefficient on a mutation in a metabolic pathway by averaging across all possible rate-  
176 determining proteins with stabilities randomly drawn from a truncated gamma  
177 distribution ( $\Delta G \sim -\Gamma(k = 5.50, \theta = 1.89)$ , for  $\Delta G < -5$ ) based on empirical data from  
178 bacteria, yeast and nematodes<sup>51</sup>. Each protein was mutated by sampling a single folding  
179 mutation from the empirically estimated normal distribution  $\Delta\Delta G \sim N(\mu = 0.9, \sigma =$   
180  $1.7)^{35,49,50}$ . Because little is known about the distribution of mutational effect sizes on



181 catalytic rate, we chose parameter values of  $\Delta\Delta H$  that yielded reasonable negative selection  
182 coefficients at ecologically relevant temperatures ( $T$ : 0-50°C,  $s = 10^{-2} - 10^{-4}$ ). Finally, we  
183 compared the resulting temperature dependence of selection in three genotypes with  
184 different hypothetical distributions of protein stabilities thought to reflect differences in  
185 thermal adaptation<sup>31</sup>, by shifting the empirical gamma distribution so that mean  $\Delta G = -6, -9$   
186 and  $-12$ , respectively (Fig 1).

187

188 Equation (7) yields three predictions: First, the strength of selection increases with  
189 temperature (Fig. 1b) as a predictable consequence of the effect of de novo mutations on  
190 protein folding ( $\Delta\Delta G$ ). Second, while the evolution of increased protein thermostability in  
191 response to hot climates (increasingly negative values of  $\Delta G$ ) produces proteins that are also  
192 more robust to mutational perturbation (Fig. 1b), we predict that cold- and warm-adapted  
193 genotypes will experience the same strength of selection on de novo mutations in their  
194 respective thermal environments, all else being equal (Fig. 1c), though thermal specialists  
195 will show a stronger temperature dependence (Fig S1.2, see also<sup>52</sup>). Third, while mutational  
196 effects on catalytic rate ( $\Delta\Delta H$ ) are largely unaffected by temperature (Eq. 4; Fig 1c), they can  
197 weaken the temperature-dependence of genome wide mutational fitness effects. The extent  
198 to which they do depends on their effect size and frequency relative to mutational effects on  
199 folding ( $\Delta\Delta G$ ) (Eq. 5, Fig. 1c).

200

201 In Supplementary 1 we show that also mutational variance in fitness (i.e. the distribution of  
202 fitness effects of de novo mutations) also conforms to these general predictions. Elevated  
203 temperature leads to a substantial increase in mutational variance and the release of cryptic  
204 genetic variation in fitness, as well as a larger fraction of both highly deleterious and

205 beneficial mutations (Fig. S1.1). Moreover, the strongest selection in any single organism is  
206 predicted to act on mutations in genes encoding proteins with low stabilities (see also<sup>51</sup>),  
207 and these genes thus contribute disproportionately to temperature dependent effects (Fig.  
208 S1.1).

209

210 Our predictions arise from two fundamental and well-established principles: i) enzymes  
211 show reversible inactivation at high temperatures<sup>31</sup>, and ii) the majority of de novo  
212 mutations act to destabilize protein structure<sup>32-36,48</sup>. Our qualitative results are therefore  
213 robust to the particular mathematical formulation of the enzyme-kinetic model, an assertion  
214 we confirmed by extending this analysis to various alternative equations recently reviewed  
215 by<sup>53</sup> (results available upon request). We also note that while we here have focused on the  
216 very essential features of protein fitness in terms of the fraction of active enzyme and its  
217 catalytic rate, the model can be expanded to, and is consistent with, a broader scope of  
218 temperature-dependent reductions in fitness, including effects from protein toxicity and  
219 aggregation arising from misfolded proteins in the cell<sup>34,48</sup> and RNA (mis)folding<sup>54</sup>.

220

221

222

223 **Figure 1: An enzyme-kinetic model of temperature dependent mutational fitness effects**

224 Predicted consequences of mutation ( $\Delta\Delta G = +0.9 \pm$

225 1.7 SD) on temperature dependent selection. In A)

226 fitness for three genotypes with sets of proteins

227 with different mean stabilities ( $\Delta G$ ) (blue, green and

228 red lines reflect mean  $\Delta G$  values of -6, -9 and -12).

229 Solid lines = wildtype, short-dashed lines = mutant

230 carrying a single folding mutation, long-dashed lines

231 = mutant carrying 10 folding mutations with

232 multiplicative effects on fitness. Reaction norms are

233 based on an example using the respective  $\Delta H$  values

234 = 19.25, 20.00 and 20.76 and  $\Gamma = 500$ . In B) the

235 expected mean selection coefficient against a single

236 folding mutation occurring at a random gene for

237 each of the three genotypes. In C, 'warm' and 'cold'

238 adapted genotypes experience equivalent strengths

239 of selection when fitness effects are assessed at a

240 temperature standardised relative to each

241 genotype's thermal optimum ( $T_R = T_{OPT} - 10^\circ\text{C}$ ,

242 for clarity only reaction norms for  $\Delta G = -6$  and  $-12$  are shown). Mutational fitness effects on catalytic

243 rate ( $\Delta\Delta H$ ) show no discernible temperature dependence (black dotted line; here  $\Delta\Delta H$  lowers fitness

244 at  $T_{opt}$  by  $s_H = 10^{-2}$ ). However, if a mutation has pleiotropic effects on both  $\Delta\Delta H$  and  $\Delta\Delta G$ , the

245 temperature dependence of selection against the mutant brought about by its effects on stability can

246 be masked (long-dash and short-dash lines equate to a  $s_H = 10^{-3}$  and  $10^{-2}$  at  $T_{opt}$ , respectively).

247

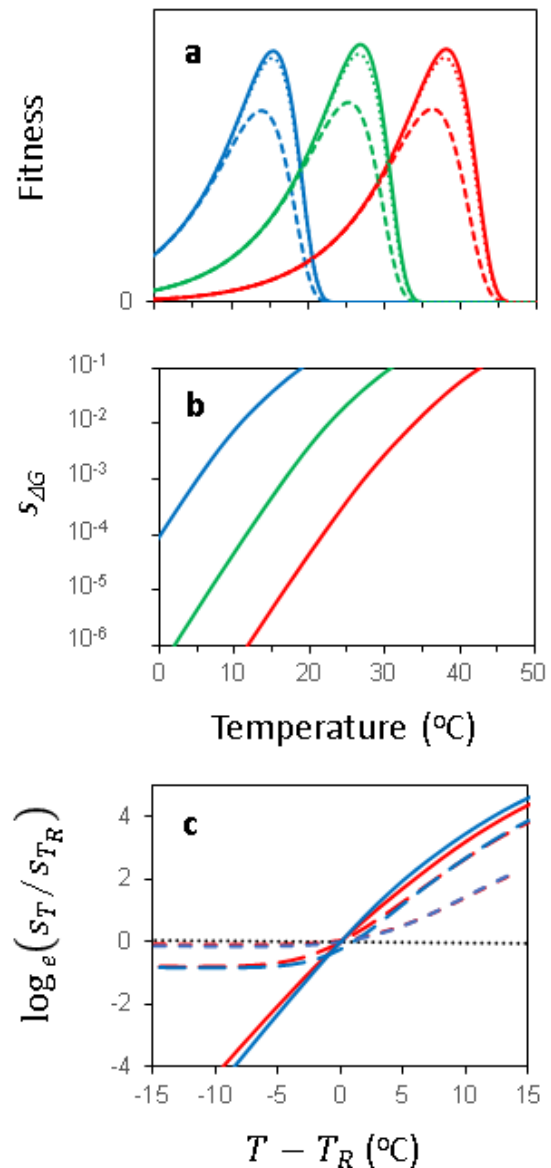

248 **Deleterious fitness effects of mutations are consistently stronger at high temperature in**  
249 **seed beetles adapted to contrasting thermal regimes**

250 To test these predictions, we measured fitness effects of induced mutations at 30°C and  
251 36°C in replicate lines of the seed beetle *Callosobruchus maculatus*, evolved at benign 30°C  
252 (3 ancestral lines) or stressful 36°C (3 warm-adapted lines) for more than 70 generations  
253 (overview in SI Fig. 2.1). Previous studies have shown that the warm-adapted lines have  
254 evolved considerably increased longevity<sup>55,56</sup>. Moreover, while lifetime offspring production  
255 is decreased at 36°C relative to 30°C ( $X^2 = 62.5$ ,  $df = 1$ ,  $P < 0.001$ ,  $n = 698$ ), this decrease is  
256 less pronounced in warm-adapted lines (interaction:  $X^2 = 7.35$ ,  $df = 1$ ,  $P = 0.007$ ; Fig. 2a). To  
257 characterize thermal adaptation further and relate it to the biophysical model, we quantified  
258 thermal performance curves for juvenile development rate and survival; two traits that  
259 presumably reflect variation in biochemical reaction rates (Eq. 1) and protein stability (Eq. 2),  
260 respectively<sup>31</sup>. In line with expectations based on the thermodynamics of enzyme function  
261<sup>43</sup>, elevated temperature generally decreased juvenile survival ( $X^2 = 76.0$ ,  $df = 3$ ,  $P < 0.001$ ,  $n =$   
262 2755) and increased development rate ( $X^2 = 1723$ ,  $df = 3$ ,  $P < 0.001$ ,  $n = 2755$ ). Divergence  
263 between ancestral and warm-adapted lines in the temperature-dependence of these two  
264 traits was weak (interaction for survival:  $X^2 = 5.43$ ,  $df = 3$ ,  $P = 0.14$ , Fig. 2b; interaction for  
265 development:  $X^2 = 6.71$ ,  $df = 3$ ,  $P = 0.082$ , Fig. 2c). Instead, ancestral lines showed consistently  
266 faster development ( $X^2 = 27.2$ ,  $df = 1$ ,  $P < 0.001$ , Fig 2b) and marginally lower survival in  
267 general ( $X^2 = 3.74$ ,  $df = 1$ ,  $P = 0.053$ , Fig. 2c). These results thus demonstrate considerable  
268 divergence between the selection regimes and are qualitatively consistent with the  
269 biophysical model of protein kinetics.

270

271

272 **Figure 2: Thermal adaptation during experimental evolution**

273 Level of adaptation to simulated climate warming measured as (A) adult offspring production at 30  
274 and 36°C, and thermal reaction norms for (B) juvenile survival and (C) development rate (means  $\pm$   
275 95% confidence limits). Blue and red symbols denote ancestral and warm-adapted lines, respectively.  
276 Although there are clear signs of a genotype by environment interaction for offspring production ( $P =$   
277 0.007), reaction norms for survival and development rate show no clear differences in temperature  
278 dependence between ancestral and warm-adapted lines. Instead, ancestral lines show generally  
279 faster development ( $P < 0.001$ ) but lower survival ( $P = 0.053$ ) across temperatures.

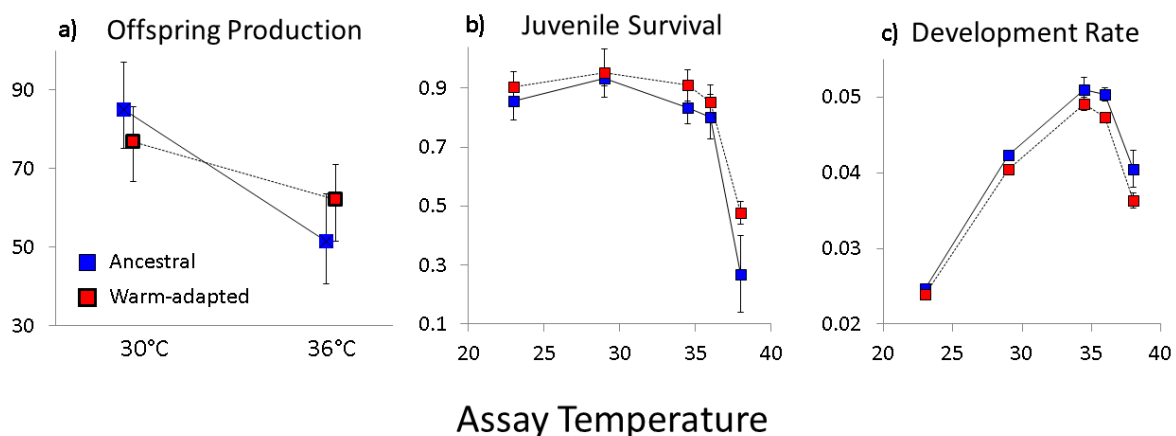

280

281

282 To measure mutational fitness effects we induced mutations genome-wide by ionizing  
283 radiation in F0 males of all lines. Males were then mated to females that subsequently were  
284 randomized to lay eggs at either 30 or 36°C. By comparing the number of F1 and F2 offspring  
285 produced in these lineages relative to that in corresponding (non-irradiated) control lineages  
286 (SI Fig. 2.2), we could quantify the cumulative fitness effect of the mutations (i.e. mutation  
287 load):  $\Delta\omega = 1 - \omega_{IRR}/\omega_{CTRL}$ , and compare it across the two assay temperatures in ancestral

288 and warm-adapted lines (Fig. 3). Elevated temperature increased  $\Delta\omega$ , assayed in both the F1  
289 ( $X^2 = 13.0$ ,  $df = 1$ ,  $P < 0.001$ ,  $n = 713$ , Fig. 3a) and F2 generation ( $X^2 = 7.44$ ,  $df = 1$ ,  $P = 0.006$ ,  $n$   
290  $= 1449$ , Fig 3b). These temperature effects were consistent across ancestral and warm-  
291 adapted lines (interaction:  $P_{F1} = 0.43$ ,  $P_{F2} = 0.90$ ; Fig. 3), lending support to the model  
292 predictions of temperature-dependent mutational fitness effects based on protein  
293 biophysics (compare Fig. 1b and Fig. 3). Indeed, the fact that ancestral and warm-adapted  
294 genotypes showed similar responses supports the tenet that high temperature, rather than  
295 thermal stress *per se*, caused the increase in selection against the induced mutations.

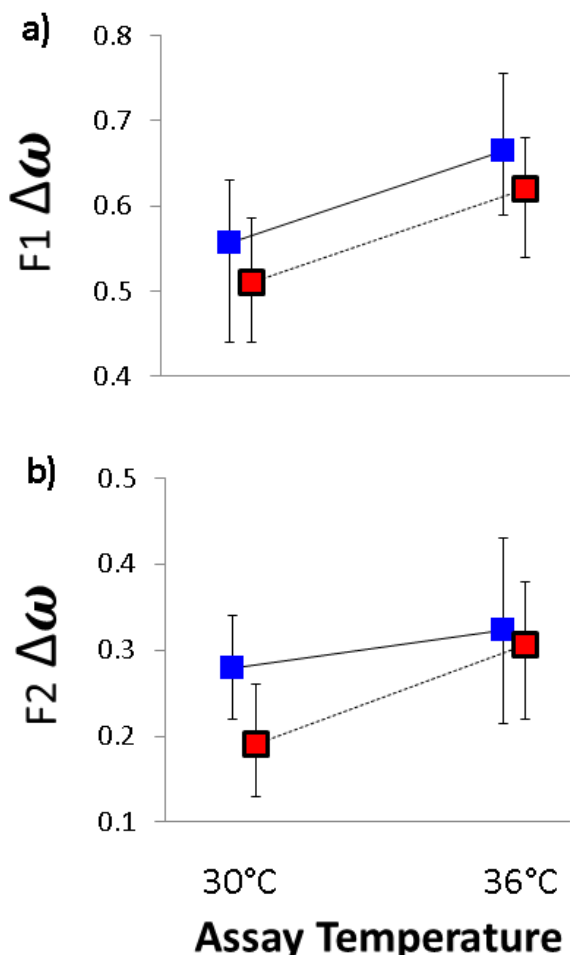

**Figure 3: The evolution of temperature dependent mutational fitness effects**

Mutation load ( $\Delta\omega$ ) (mean  $\pm$  95% confidence limits) measured for (A) F1 juvenile survival and (B) F2 adult offspring production, at the two assay temperatures.

There was an overall strong and significant increase in  $\Delta\omega$  at hot temperature. This effect was similar across the three ancestral (blue) and three warm-adapted (red) lines, in both the F1 ( $P < 0.001$ ) and F2 generation ( $P = 0.006$ ).

296

297

298

299 **Mutational fitness effects across benign and stressful environments in unicellular and**  
300 **multicellular organisms**

301 To test model predictions further, we retrieved 100 paired estimates comparing the strength  
302 of selection on de novo mutations across benign and stressful abiotic environments from 28  
303 studies on 11 organisms, spanning viruses and unicellular bacteria and fungi, to multicellular  
304 plants and animals. These studies measured fitness effects in form of Malthusian growth  
305 rate, survival, or reproduction in mutants accrued by mutation accumulation protocols,  
306 mutagenesis, or targeted insertions/deletions, relative to wild-type controls (SI Table 3.1).  
307 Hence, selection against accumulated mutations could be estimated as the mutation load:  
308  $\Delta\omega_i = 1 - \omega_i^*/\omega_i$ , where  $\omega_i^*$  and  $\omega_i$  is the fitness in environment  $i$  of the mutant and wildtype  
309 respectively. An estimate controlling for between-study variation was retrieved by taking the  
310 log-ratio of the mutation load at the stressful relative to corresponding benign environment  
311 in each study:  $\text{Log}_e[\Delta\omega_{\text{stress}}/\Delta\omega_{\text{benign}}]$ , with a ratio above (below) 0 indicating stronger  
312 (weaker) selection against mutations under environmental stress. We analysed log-ratios in  
313 meta-analysis using Bayesian mixed effects models incorporating study ID and organism  
314 crossed with the form of environmental stress (see further below) as random effects. In  
315 addition, the contribution of each measure to the final model was weighted by the  
316 approximated standard error of the estimated log-ratio (see *Methods*). We further explored  
317 any potential publication bias in the collated data by plotting the precision of each estimate  
318 of the log-ratio (1/standard error) against its mean in a funnel plot (Fig. SI 3.5). This showed  
319 no clear evidence for such bias.

320

321 **A universal temperature dependence of mutational fitness effects**

322 Analysing all collated log-ratios together confirmed predictions from fitness landscape  
323 theory<sup>23,24</sup> suggesting that selection against de novo mutation does not generally seem to be

324 greater under stressful abiotic conditions (log-ratio = 0.19, 95% CI: -0.07-0.45;  $P_{\text{MCMC}} = 0.13$ ,  
325 Fig 4). Next we analysed the 40 estimates derived at high and low temperature stress  
326 separately from the 60 estimates derived from various other stressful environments (of  
327 which increased salinity, other chemical stressors, and food stress, were most common: SI  
328 Table 3.1). This revealed that selection on de novo mutation increases at high temperature  
329 stress (log-ratio  $\leq 0$ ;  $P_{\text{MCMC}} < 0.001$ ,  $n = 21$ , studies = 10), whereas there was no increase in  
330 selection at low temperature stress (log-ratio  $\leq 0$ ;  $P_{\text{MCMC}} = 0.67$ ,  $n = 19$ , studies = 11) or for  
331 the other forms of stress pooled (log-ratio  $\leq 0$ ;  $P_{\text{MCMC}} = 0.48$ ,  $n = 54$ , removing 6 estimates for  
332 s in each environment  $\sim 0$ , studies = 22). Moreover, elevated temperature led to a  
333 significantly larger increase in selection relative to both cold stress ( $P_{\text{MCMC}} = 0.004$ ) and the  
334 other stressors pooled ( $P_{\text{MCMC}} = 0.002$ ) (Fig 4 & SI Table 3.2).

335

336 Next we explored whether there were differences in the effects of environmental stress on  
337 selection between unicellular and multicellular species in our dataset by incorporating  
338 cellularity as a two-level factor in the analysis. There was a tendency for cold stress to  
339 decrease selection in unicellular species and increase it in multicellular species, but this  
340 effect was marginally non-significant (interaction:  $P_{\text{MCMC}} = 0.066$ ). Moreover, 5 of the 6  
341 estimated log-ratios at cold stress for multicellular species derive from *D. melanogaster* and  
342 drive this trend (Fig. 5b). We found no evidence for differences in the effect of elevated  
343 temperature on selection between the four multicellular and three unicellular species ( $P_{\text{MCMC}}$   
344 = 0.45). Indeed, mutational fitness effects were greater at elevated temperature in 8/10 and  
345 10/11 cases in multicellular and unicellular species, respectively (combined binomial test,  
346 18/21 cases:  $P_{\text{binom}} = 0.0015$ ). Notably, the 12 log-ratios that were significantly different from  
347 0 ( $>1.96\text{SE}$ ) at high temperature stress were all positive, signifying increased selection ( $P_{\text{binom}}$



348 = 0.0005, Fig S3.5). These results are robust to analysis method and do not change when  
 349 using maximum likelihood estimation (SI Table 3.2). Additionally, by analysing a reduced  
 350 number of studies for which we could extract 64 paired estimates of mutational variance, we  
 351 show that this alternative measure of mutational effects also increases with temperature  
 352 and follows the same general patterns as the mutation load (Fig 4 and SI Table 3.3).

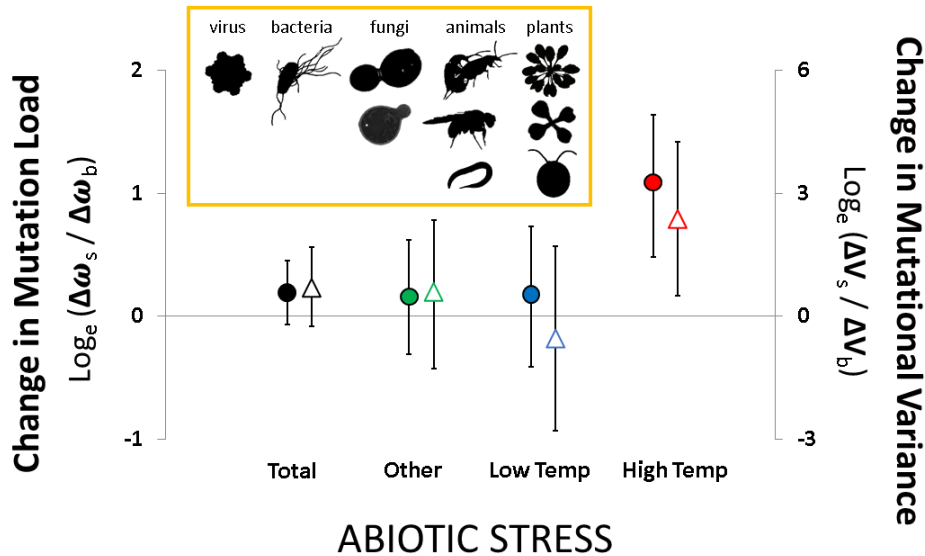

353

#### 354 **Figure 4: Meta-analysis of mutational fitness effects in stressful environments**

355 Meta-analysis of the effect of abiotic stress on the mean strength of selection against de novo  
 356 mutations (filled points) and mutational variance (open triangles) analysed by log-ratios (Bayesian  
 357 posterior modes  $\pm$  95% credible intervals):  $\Delta\omega_{\text{stress}}/\Delta\omega_{\text{benign}}$  and  $\Delta V_{\text{stress}}/\Delta V_{\text{benign}} > 0$  correspond to  
 358 greater mutational fitness effects under environmental stress. The 94 paired estimates of  $\Delta\omega$  (filled  
 359 circles) show that selection is not greater in stressful environments overall ( $P = 0.13$ ) and highly  
 360 variable across the 25 studies analyzed. However, estimates of  $\Delta\omega$  at high temperature are greater  
 361 than their paired estimates at benign temperature ( $P < 0.001$ ). These results were qualitatively the  
 362 same when analysing the fewer available estimates of mutational variance ( $\Delta V$ : open triangles,  $P =$   
 363 0.02). The box shows the eleven species included in the analysis (of which two were roundworms),  
 364 covering four major groups of the tree of life. See main text and Supplementary 3 for further details.

365

366 Using the 40 paired estimates of mutation load at contrasting temperatures we partitioned  
367 effects on the strength of selection from i) stress *per se*; quantified as the reduction in mean  
368 fitness at the stressful temperature relative to the benign temperature ( $1 - \bar{w}_{\text{stress}}/\bar{w}_{\text{benign}}$ ),  
369 and ii) that of the temperature shift itself; quantified as the magnitude and direction of the  
370 temperature shift:  $T_{\text{stress}} - T_{\text{benign}}$ . The strength of selection was not significantly related to  
371 stress ( $P_{\text{MCMC}} > 0.8$ ). However, a shift towards warmer assay temperature *per se* caused a  
372 substantial increase in mutation load (slope coefficient = 0.070, CI: 0.044-0.10,  $P_{\text{MCMC}} <$   
373 0.001, Fig 5). There was also a non-linear effect of temperature (non-linear coefficient =  
374 0.007, CI: 0.003-0.012,  $P_{\text{MCMC}} = 0.002$ , Fig 5), equivalent to that predicted to result from  
375 combined unconditional ( $\Delta\Delta H$ ) and temperature dependent ( $\Delta\Delta G$ ) mutational effects (compare  
376 Fig. 1C and Fig. 5). These results thus further support that selection against de novo  
377 mutations generally increases at high temperature in ectotherms. Again the effect of cold  
378 temperature on the strength of selection seemed to differ between the unicellular and  
379 multicellular species studied (difference in slope: 0.055, CI: 0.008-0.099,  $P_{\text{MCMC}} = 0.024$ , Fig.  
380 5b). However, given that this pattern is driven almost solely by the 5 estimates from *D.*  
381 *melanogaster*, more data is needed to say anything concrete about effects of cellularity on  
382 mutational fitness effects at cold temperature.

383

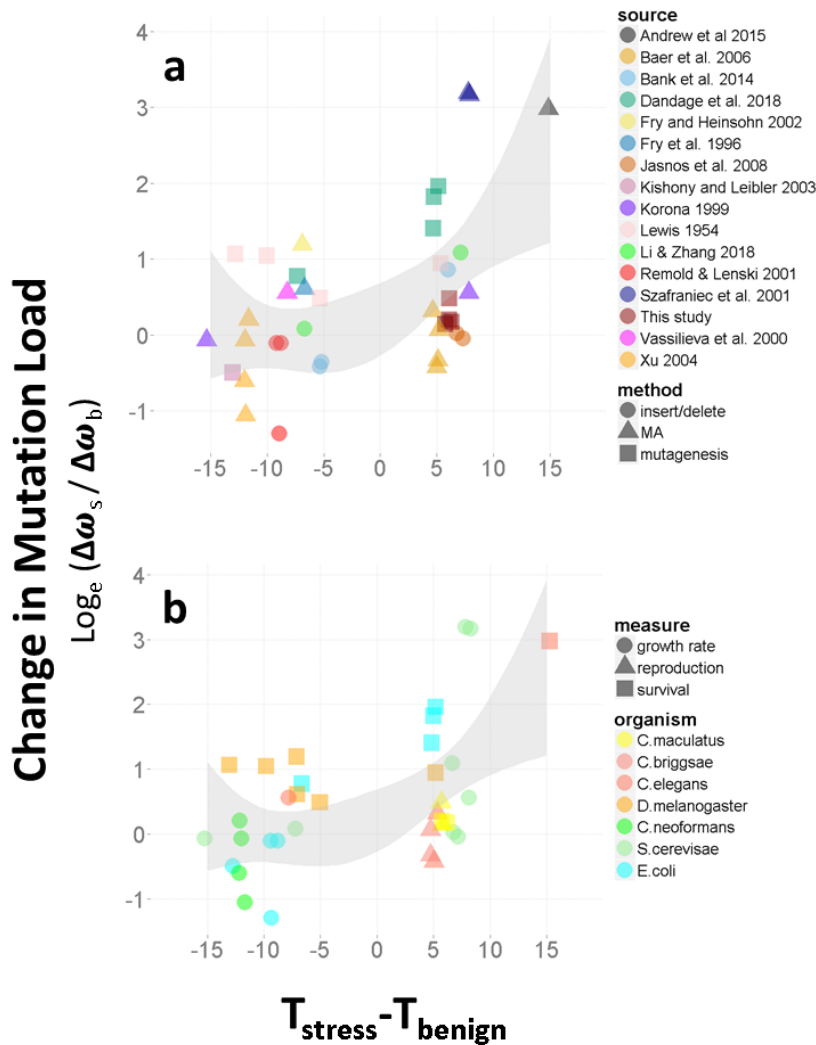

384

385 **Figure 5: Meta-analysis of temperature-dependent mutational fitness effects**

386 Temperature-dependent mutational fitness effects. The strength of selection on de novo mutations  
 387 as a function of the direction and magnitude of the temperature shift between the benign and  
 388 stressful temperature. In (A) the 16 studies analysed and the method used to induce mutations, is  
 389 depicted. In (B) the seven species analysed, and the fitness measure taken, is depicted. Selection  
 390 generally increases with temperature ( $P_{\text{MCMC}} < 0.001$ ) whereas stress per se (quantified as the mean  
 391 reduction in relative fitness between the benign and stressful temperature) did not affect the  
 392 strength of selection ( $P_{\text{MCMC}} > 0.8$ ). The grey shaded area represents the 95% CI from a second degree  
 393 polynomial fit of the log-ratios on temperature, weighted by the statistical significance of each  
 394 estimate (absolute log-ratio/standard error). Points are jittered for illustrative purposes.

395 The fitness load at mutation selection balance is predicted to equal the genomic deleterious  
396 mutation rate, but to be unrelated to the mean deleterious effect of mutation<sup>5,21</sup>. The long  
397 term consequences of the revealed relationship under climate warming will therefore  
398 depend on if the predicted effects of temperature on protein folding will change the relative  
399 abundance of nearly neutral to strongly deleterious alleles<sup>29,57</sup>. In SI 3.4 we show that the  
400 scaling relationship between the mutational variance and mean mutational effect implies  
401 that increases in both the number of (conditionally) expressed mutations as well as increases  
402 in their average fitness effect are underlying the detected increase in  $\Delta\omega$  under temperature  
403 stress, further suggesting that our model provides an accurate account of the underlying  
404 mechanistic basis for temperature-dependent mutational fitness effects.

405

## 406 **DISCUSSION**

407 Early work has revealed that specific mutations can show strong temperature sensitivity, but  
408 how temperature systematically affects selection on polygenic variation across the genome,  
409 and therefore fitness and adaptive potential of whole organisms, has not been empirically  
410 demonstrated. Here we show that elevated temperature increases genome-wide selection  
411 and genetic variation in fitness, an observation that is consistent with the applied biophysical  
412 model of enzyme kinetics, which ascribes these increases to magnified allelic effects on  
413 protein folding at elevated temperature (Fig. 1, Fig. S1.1). The model and data further  
414 suggest that, while the evolution of protein thermostability in response to hot climates can  
415 indirectly confer mutational robustness, the temperature-mediated increase in the strength  
416 of selection will be similar for cold- and warm adapted taxa occupying their respective  
417 thermal niches in nature. The data and model predicts that, without adaptation, the  
418 depicted scenario of 2-4°C of warming by the end of this century<sup>58</sup> will result in a doubling of

419 genome-wide selection on average, although the effect may vary between organisms (Fig. 5,  
420 Fig. S1.2) and depends on model assumptions regarding unconditional mutational effects  
421 (Fig. 1c). Nevertheless, the effect may be underestimated, given the non-linear relationship  
422 between selection strength and temperature and the predicted increase in occurrence of  
423 heat waves<sup>58</sup>. In contrast, environmental stress *per se* did not have a significant effect on the  
424 strength of selection on de novo mutations in any of our analyses, implying that mutational  
425 robustness is not generally greater in benign relative to stressful environments<sup>23,24</sup>.

426

427 Our analyses have been limited to purifying selection as a consequence of the fact that the  
428 very majority of de novo mutations are deleterious. However, increased conditional genetic  
429 variation in protein phenotypes at elevated temperature are in rare cases predicted to  
430 confer fitness benefits<sup>25,30,50</sup>, as seen in our model predictions on the distribution of fitness  
431 effects of mutations at different temperatures (Fig. S1.1). Thus, the increase in mutational  
432 effects at warm temperature is predicted to influence regional patterns of standing genetic  
433 variation and future evolutionary potentials under climate change. Previous studies have  
434 highlighted a range of possible consequences of temperature on evolutionary potential in  
435 tropical versus temperate regions, including faster generation times<sup>38</sup>, higher maximal  
436 growth rates<sup>59</sup>, higher mutation rates<sup>40,56</sup> and more frequent recombination<sup>60,61</sup> in the  
437 former. Our results imply that also the efficacy of selection may be greater in the warmer  
438 tropical regions, which together with the aforementioned factors predict more rapid  
439 evolution and diversification, in line with the greater levels of biodiversity in this area<sup>62,63</sup>.  
440 However, implications for species persistence under climate change will crucially depend on  
441 demographic parameters such as reproductive rates and effective population size<sup>6,9,64</sup>, and  
442 greater selection in tropical areas may even result in increased extinction rates if

443 evolutionary potential is limited<sup>37,59,65,66</sup>. Such a scenario could be envisioned if temperature-  
444 mediated selection has led to a greater erosion of genetic variation in ecologically relevant  
445 traits, such as reported for thermal tolerance limits in tropical *Drosophila* species<sup>67</sup>.  
446 Moreover, protein stability has itself been suggested to increase evolvability and innovation  
447 by allowing slightly destabilizing mutations with conditionally beneficial effects on other  
448 aspects of protein fitness to be positively selected<sup>68-70</sup>. Hence, the destabilizing effect of  
449 rising global temperatures on protein folding may, by reducing this buffering capacity, limit  
450 the potential for evolutionary innovation.

451

452 The observed temperature dependence of mutational effects builds a scenario in which  
453 contemporary climate warming may lead to molecular signatures of increased purifying  
454 selection and genome-wide convergence in taxa inhabiting similar thermal environments. In  
455 support of this claim, Sabath et al. (2013) showed that growth temperature across  
456 thermophilic bacteria tend to be negatively correlated to the non-synonymous to  
457 synonymous nucleotide substitution-rate (dN/dS-ratio), suggesting stronger purifying  
458 selection in the most pronounced thermophiles<sup>71</sup>. Effects could possibly extend beyond  
459 nucleotide diversity to other aspects of genome architecture. For example, Drake (2009)  
460 showed that two thermophilic microbes have substantially lower mutation rates than their  
461 seven mesophilic relatives, implying that increased fitness consequences of mutation at hot  
462 temperature can select for decreased genome-wide mutation rate<sup>72</sup>. Following the same  
463 reasoning, increased mutational effects in warm climates could select for increased  
464 mutational robustness<sup>73-75</sup>. As mutation pressure on single genes is weak, the evolution of  
465 such increased genome integrity would, at least in organisms with small population size<sup>76,77</sup>,  
466 likely involve mechanisms regulating mutation rate and/or robustness globally<sup>78</sup> such as the

467 upregulation of chaperone proteins, known to assist both protein folding<sup>31,79</sup> and DNA  
468 repair<sup>80</sup>. Additionally, mutational robustness may also result indirectly from selection for  
469 increased environmental robustness<sup>26–29,34</sup>, in line with predictions from the presented  
470 biophysical model suggesting that increased protein thermostability confers increased  
471 robustness to de novo mutation (for a given temperature: Fig. 1b).

472

473 Environmental tolerance has classically been conceptualized and modelled by a Gaussian  
474 function mapping organismal fitness to an environmental gradient (e.g.<sup>6,81</sup>). In this  
475 framework stress is not generally expected to increase the mean strength of purifying  
476 selection against de novo mutation<sup>23</sup>, a prediction supported by our estimates of selection  
477 under forms of environmental stress other than elevated temperature (Fig. 4). This  
478 framework assumes that mutational effects on, or standing genetic variation in, the  
479 phenotypic traits under selection remain constant across environments. The applied  
480 biophysical model differs fundamentally from this assumption in that mutational effects on  
481 the phenotypes under selection, in terms of protein folding states, are assumed to increase  
482 exponentially with temperature. While supported by a number of targeted studies on  
483 proteins<sup>32–36,82</sup>, it remains less clear how the effects on protein and RNA folding map to the  
484 level of morphological and life history traits, which have previously been used with varying  
485 outcome to study selection and phenotypic effects under environmental stress<sup>83–89</sup>.

486

487 Another open question is how the unveiled temperature-dependence interacts with other  
488 features expected to influence the distribution of fitness effects of segregating genetic  
489 variants, such as thermal niche width (Fig. S1.2), genome size, phenotypic complexity<sup>90,91</sup>  
490 and effective population size<sup>9,64,76,92</sup>. Unicellular and multicellular organisms differ greatly in

491 these aspects, and interestingly, our data hint at a difference in the temperature  
492 dependence of mutational fitness effects between these two groups at cold temperature  
493 (Fig 5b). Our model shows that the temperature dependence is weakened by an increased  
494 fraction of unconditionally (i.e. temperature-independent) deleterious mutations (Fig. 1c).  
495 Differences between unicellular and multicellular organism could therefore arise if the link  
496 between fitness and rate-dependent processes at the level of enzymes is more direct in  
497 unicellular compared to multicellular organisms, resulting in a higher fraction of  
498 unconditional mutations and weaker temperature dependence in the latter. Questions such  
499 as these will be crucial to answer in order to understand regional and taxonomic patterns of  
500 genetic diversity and predict evolutionary trajectories under environmental change.

501

## 502 **Methods:**

### 503 **Temperature-dependent fitness effects of de novo mutations in seed beetles**

#### 504 *Study Populations*

505 *Callosobruchus maculatus* is a cosmopolitan capital breeder. Adult beetles do not require  
506 food or water to reproduce at high rates, starting from the day of adult eclosion<sup>93</sup>. The  
507 juvenile phase is completed in approximately three weeks, and egg to adult survival is above  
508 90% at benign 30°C<sup>94</sup>. The lines were derived from an outbred population created by mixing  
509 beetles collected at three nearby sites in Nigeria<sup>95</sup>. This population was reared at 30°C on  
510 black eyed beans (*Vigna unguiculata*), and maintained at large population size for >90  
511 generations prior to experimental evolution. Replicate lines were kept at 30°C (ancestral  
512 lines) or exposed to gradually increasing temperatures from 30°C to stressful 36°C for 20  
513 generations (i.e. 0.3°C/generation) and then kept at 36°C (warm-adapted lines). Population



514 size was kept at 200 individuals for the first 20 generations and then increased to 500  
515 individuals in each line. In this study we compared three replicate lines of each regime.

516

### 517 *Thermal reaction norms for juvenile survival and development rate*

518 Previous studies have revealed significant differentiation in key life history traits between  
519 the regimes<sup>55,56</sup>. Here we quantified reaction norms for juvenile survival and development  
520 rate across five temperatures (23, 29, 35, 36 & 38°C) following 100 generations of  
521 experimental evolution. Two generations prior to the assaying all six lines were moved to  
522 30°C, which is a beneficial temperature to both sets of lines (Fig. 2)<sup>56</sup>, to ascertain that  
523 differences between evolution regimes were due to genetic effects. Newly emerged second  
524 generation adults were allowed to mate and lay eggs for 24h on new *V. unguiculata* seeds  
525 that were subsequently randomized to each assay temperature in 90mm diameter petri-  
526 dishes with ca. 100 seeds per dish with each carrying no more than 4 eggs to make sure  
527 larval food was provided ad libitum. Two dishes were set up per temperature for each line.  
528 In total we scored egg-to-adult survival and development time for 2755 offspring evenly split  
529 over the five assay temperatures and six replicate lines. Survival was analysed using  
530 dead/alive as the binomial response, and development rate (1/development time) as a  
531 normally distributed response using generalized and general linear mixed effects models,  
532 respectively, in the lme4 package<sup>96</sup> for R. Temperature and selection regime as well as their  
533 interaction were included as fixed effects, and line identity crossed by assay temperature  
534 was added as random effect.

535

536

537 *Temperature dependent mutational fitness effects*

538 We compared fitness effects of induced mutations at 30°C and 36°C for each line of the two  
539 evolution regimes. At the onset of our experiments in 2015 and 2016, the populations had  
540 been maintained for 70 and 85 generations, respectively. A graphical depiction of the design  
541 can be found in Supplementary 2. All six lines were maintained at 36°C for two generations  
542 of acclimation. The emerging virgin adult offspring of the second generation were used as  
543 the F0 individuals of the experiment.

544

545 We induced mutations by exposing the F0 males to gamma radiation at a dose of 20 Grey  
546 (20 min treatment). Gamma radiation causes double and single stranded breaks in the DNA,  
547 which in turn induces DNA repair mechanisms<sup>80</sup>. Such breaks occur naturally during  
548 recombination, and in yeast to humans alike, point mutations arise due to errors during their  
549 repair<sup>80</sup>. Newly emerged (0-24h old) virgin males were isolated into 0.3ml ventilated  
550 Eppendorf tubes and randomly assigned to either be placed inside a Gamma Cell-40  
551 radiation source (irradiated), or on top of the machine for the endurance of the treatment  
552 (controls). After two hours at room temperature post-irradiation males were emptied of  
553 ejaculate and mature sperm by mating with females (that later were discarded) on heating  
554 plates kept at 30°C. The males were subsequently moved back to the climate cabinet to  
555 mature a new ejaculate. This procedure discarded the first ejaculate that will have contained  
556 damaged seminal fluid proteins in the irradiated males<sup>97</sup>, causing unwanted paternal effects  
557 in offspring. Irradiation did not have a mean effect on male longevity in this experiment, nor  
558 did it affect the relative ranking in male longevity among the studied populations<sup>56</sup>,  
559 suggesting that paternal effects owing to the irradiation treatment (other than the  
560 mutations carried in the sperm) were small. After another 24h, males were mated with

561 virgin females from their own population. The mated females were immediately placed on  
562 beans presented ad libitum and randomized to a climate cabinet set to either 30°C or 36°C  
563 (50% RH) and allowed to lay their lifetime storage of F1 eggs. We set up 19-38 F0 males (and  
564 mating couples) per treatment, assay temperature and line, and 713 males in total.

565

566 To measure mutational effects in the F2 generation, we applied a Middle Class  
567 Neighborhood breeding design to nullify selection on all but the unconditionally lethal  
568 mutations amongst F1 juveniles<sup>98</sup>; from the F1 survivors, we crossed a randomly selected  
569 male and female offspring per family with another family from the same treatment and line.

570 From a few treatment:line combinations with a low number of F0 families set up, we did this  
571 procedure twice to get a more balanced sample size. This approach allowed us to quantify  
572 the cumulative deleterious fitness effect of all but the unconditionally lethal mutations  
573 induced in F0 males (i.e. mutation load) by comparing the production of F2 adults in  
574 irradiated lineages, relative to the number of adults descending from F0 controls (Fig. S2).

575 We also used F1 adult counts to derive this estimate, acknowledging that it may include non-  
576 trivial paternal effects from the irradiation treatment, in addition to pure mutational effects.

577 However, results based on F1 and F2 estimates were consistent (Fig 3). Thus, to estimate the  
578 effects of elevated temperature on mutational fitness effects in the two genetic  
579 backgrounds, we analysed the number of offspring produced as a Poisson response, using

580 generalized linear mixed effects models, testing for interactions between radiation  
581 treatment, assay temperature and evolution regime. We included each individual  
582 observation as a random effect to account for over-dispersion in the data. Mutation load is  
583 formally quantified as offspring production in irradiated lineages *relative* to corresponding

584 controls. To better illustrate the results we therefore also ran Bayesian analyses using the

585 MCMCglmm package<sup>96</sup> with the same model structure, but assuming a normally distributed  
586 response, and calculated the posterior estimates of mutation load ( $\Delta\omega = 1 - \omega_{IRR}/\omega_{CTRL}$ )  
587 directly from these models (Fig. 3). The MCMC resampling ran for 1.000.000 iterations,  
588 preceded by 500.000 burn-in iterations that were discarded. Every 1000<sup>th</sup> iteration was  
589 stored, resulting in 1000 independent posterior estimates from each model. We used weak  
590 priors for the random effects as recommend in<sup>96</sup>.

591

### 592 **Meta-analysis of selection on de novo mutation in benign and stressful environments**

593 We looked for studies that had measured fitness effects of de novo mutations in at least two  
594 environments, of which one had been labelled stressful relative to the other by the  
595 researchers of the study. We started by extracting data from studies reported in two earlier  
596 reviews on mutational fitness effects<sup>23,24</sup>. We then used Google Scholar to search the  
597 literature citing these papers. In addition we also made own searches including the search  
598 terms “mutation”, “selection”/“fitness” and “environment”/“stress”/“temperature””. We  
599 collated selection coefficients along with their standard errors from raw data, tables or  
600 figures from the original publications. In all but two cases analysed this labelling was correct  
601 in the sense that fitness estimates, based either on survival, reproductive output or  
602 population growth rate, were lower in the environment labelled as stressful. In the  
603 remaining two cases, the temperature assigned as stressful did not have an effect on the  
604 nematode *Caenorhabditis briggsae*<sup>99</sup>; these estimates were therefore excluded when  
605 analysing effects of environmental stress on selection (Fig. 4), but included when analysing  
606 the effect of temperature (Fig 5). The studies measured effects of mutations accrued by  
607 mutation accumulation, mutagenesis, or targeted insertions/deletions, relative to wild-type  
608 controls. We found a few cases that were excluded from analysis since it seemed likely that

609 the protocol used to accrue mutations (mutation accumulation at population sizes >2) may  
610 have failed to remove selection, biasing subsequent comparisons of mutational fitness  
611 effects across environments. In total we retrieved 100 paired estimates of selection from 28  
612 studies and 11 organisms, spanning unicellular viruses and bacteria to multicellular plants  
613 and animals (summary in Supplementary 3). Ultimately, three of these studies (and six  
614 paired estimates of selection) were discarded since selection coefficients in both the benign  
615 and stressful environment were  $\approx 0$  and could not be analyzed further.

616

617 An estimate controlling for between-study variation was calculated by taking the log-ratio of  
618 the cumulative fitness effect of the induced mutations at stressful relative to corresponding  
619 benign conditions in each study:  $\text{LOG}_e[\Delta\omega_{\text{stress}}/\Delta\omega_{\text{benign}}]$ , where  $\Delta\omega = 1 - \omega^{\text{mutant}}/\omega^{\text{CTRL}}$ .  
620 Hence, a ratio above (below) 0 indicates stronger (weaker) selection against mutations  
621 under stress. We used both REML and Bayesian linear mixed effects models (available in the  
622 MCMCglmm package<sup>98</sup> for R) to estimate if log-ratios differed from 0 for three levels of  
623 environmental stress: cold temperature, warm temperature, and other types of stress  
624 pooled (Table SI 3.1), as well as for the total effect of stress averaged across all studies. We  
625 also tested if log-ratios differed between the three types of abiotic stress. All models  
626 included stress-type, mutation induction protocol and fitness estimate as main effects,  
627 although effects of the latter two were never significant. We included study organism and  
628 study ID as random effects. Additionally, study organism was crossed with stress type to  
629 control for species variation and phylogenetic signal. To further explore large scale signals in  
630 the data we performed an analysis including a fixed factor encoding uni- or multicellularity,  
631 which was crossed with stress type, allowing us to test for differences in selection between  
632 the two groups.

633

634 Using the 40 estimates that compared the strength of selection across temperatures, we  
635 partitioned the effect of i) temperature stress; quantified as the reduction in mean fitness at  
636 the stressful temperature relative to the benign temperature (Table S3.1), and ii) that of  
637 temperature itself; quantified as the linear (1<sup>st</sup> polynomial coefficient) and non-linear (2<sup>nd</sup>  
638 polynomial coefficient) effect of the magnitude and direction of the temperature shift:  $T_{\text{stress}}$   
639 -  $T_{\text{benign}}$ . We included stress and temperature as the two fixed effect covariates, and study  
640 organism and study ID as random effects. Study organisms were also allowed to have  
641 random slopes for the temperature effect to control for between-species variation in the  
642 temperature dependence. Again we added a fixed effect encoding uni- or multicellularity  
643 crossed by the temperature covariate to test if the two groups differed in the temperature  
644 dependence of mutational fitness effects.

645

646 To weight each estimate's contribution to the final meta analytic results by its sampling  
647 variance, we passed the standard error (SE) of each log-ratio to MCMCglmm using the  
648 `idh(SE):us` command. The standard errors were approximated using laws of error  
649 propagation for ratios, but since this technique is known to heavily inflate standard errors  
650 when the denominator approaches zero<sup>100</sup>, we simulated unidirectional standard errors for  
651 the 10 log-ratios for which  $\Delta\omega_{\text{benign}}$  (i.e. the denominator) was smaller than 1.96 SE. This was  
652 done by drawing 10.000 samples of  $\Delta\omega_{\text{stress}}$  and  $\Delta\omega_{\text{benign}}$  from a normal distribution defined  
653 by their reported mean and standard error and then discarding the 50% of the simulations in  
654 which values of  $\Delta\omega_{\text{benign}}$  were below its mean. We then approximated the unidirectional  
655 (downwards) error of the log-ratio based on the remaining simulations by calculating the  
656 average deviation from the mean log-ratio. Note here that this unidirectional error

657 corresponds directly to whether the log-ratio was significantly different from zero or not (i.e.  
658 giving the uncertainty downwards for positive ratios). We present a funnel plot depicting the  
659 precision (1/SE) and mean log-ratio in Supplementary 3 (Fig. S3.5).

660

661 In all models, the MCMC resampling ran for 1.000.000 iterations, preceded by 500.000 burn-  
662 in iterations that were discarded. Every 1000<sup>th</sup> iteration was stored, resulting in 1000  
663 independent posterior estimates from each model. We used standard priors for the fixed  
664 effects and weak priors for the random effects. Variance for the random effect incorporating  
665 the within-study standard errors was fixed to 1.

666

## 667 **References**

- 668 1. Kimura, M. Evolutionary Rate at the Molecular Level. *Nature* **217**, 624–626 (1968).
- 669 2. Price, G. R. Selection and Covariance. *Nature* **227**, 520–521 (1970).
- 670 3. Lande, R. The maintenance of genetic variability by mutation in a polygenic character with linked  
671 loci. *Genet. Res.* **26**, 221–235 (1975).
- 672 4. Turelli, M. Heritable genetic variation via mutation-selection balance: Lerch’s zeta meets the  
673 abdominal bristle. *Theor. Popul. Biol.* **25**, 138–193 (1984).
- 674 5. Haldane, J. B. S. The Effect of Variation of Fitness. *Am. Nat.* **71**, 337–349 (1937).
- 675 6. Bürger, R. & Lynch, M. EVOLUTION AND EXTINCTION IN A CHANGING ENVIRONMENT: A  
676 QUANTITATIVE-GENETIC ANALYSIS. *Evol. Int. J. Org. Evol.* **49**, 151–163 (1995).
- 677 7. Chevin, L.-M., Lande, R. & Mace, G. M. Adaptation, Plasticity, and Extinction in a Changing  
678 Environment: Towards a Predictive Theory. *PLoS Biol.* **8**, e1000357 (2010).
- 679 8. Merilä, J. & Hendry, A. P. Climate change, adaptation, and phenotypic plasticity: the problem and  
680 the evidence. *Evol. Appl.* **7**, 1–14 (2014).

- 681 9. Kokko, H. *et al.* Can Evolution Supply What Ecology Demands? *Trends Ecol. Evol.* **32**, 187–197  
682 (2017).
- 683 10. Dietrich, M. & Skipper Jr, RA. A shifting terrain: A brief history of the adaptive landscape. in *The*  
684 *Adaptive Landscape in Evolutionary Biology* (eds. Svensson EI & Calsbeek, R) **2012**, (Oxford  
685 University Press).
- 686 11. Pigliucci, M. Landscapes, Surfaces, and Morphospaces: What Are They Good For? in *The Adaptive*  
687 *Landscape in Evolutionary Biology* (eds. Svensson, E. & Calsbeek, R.) 26–38 (Oxford University  
688 Press, 2013). doi:10.1093/acprof:oso/9780199595372.003.0003
- 689 12. Smith, J. M. Natural Selection and the Concept of a Protein Space. *Nature* **225**, 563–564 (1970).
- 690 13. Weinreich, D. M., Delaney, N. F., DePristo, M. A. & Hartl, D. L. Darwinian Evolution Can Follow  
691 Only Very Few Mutational Paths to Fitter Proteins. *Science* **312**, 111–114 (2006).
- 692 14. Tenaillon, O. *et al.* The molecular diversity of adaptive convergence. *Science* **335**, 457–461  
693 (2012).
- 694 15. de Visser, J. A. G. M. & Krug, J. Empirical fitness landscapes and the predictability of evolution.  
695 *Nat. Rev. Genet.* **15**, 480–490 (2014).
- 696 16. Storz, J. F. Causes of molecular convergence and parallelism in protein evolution. *Nat. Rev.*  
697 *Genet.* **17**, 239–250 (2016).
- 698 17. Nei, M. The new mutation theory of phenotypic evolution. *Proc. Natl. Acad. Sci.* **104**, 12235–  
699 12242 (2007).
- 700 18. Houle, D., Bolstad, G. H., van der Linde, K. & Hansen, T. F. Mutation predicts 40 million years of  
701 fly wing evolution. *Nature* **548**, 447–450 (2017).
- 702 19. Lässig, M., Mustonen, V. & Walczak, A. M. Predicting evolution. *Nat. Ecol. Evol.* **1**, 0077 (2017).
- 703 20. Bailey, S. F., Blanquart, F., Bataillon, T. & Kassen, R. What drives parallel evolution?: How  
704 population size and mutational variation contribute to repeated evolution. *BioEssays* **39**,  
705 e201600176 (2017).



- 706 21. Agrawal, A. F. & Whitlock, M. C. Mutation Load: The Fitness of Individuals in Populations Where  
707 Deleterious Alleles Are Abundant. *Annu. Rev. Ecol. Evol. Syst.* **43**, 115–135 (2012).
- 708 22. Lande, R. & Shannon, S. The Role of Genetic Variation in Adaptation and Population Persistence  
709 in a Changing Environment. *Evolution* **50**, 434–437 (1996).
- 710 23. Martin, G. & Lenormand, T. The fitness effect of mutations across environments: a survey in light  
711 of fitness landscape models. *Evolution* **60**, 2413–2427 (2006).
- 712 24. Agrawal, A. F. & Whitlock, M. C. Environmental duress and epistasis: how does stress affect the  
713 strength of selection on new mutations? *Trends Ecol. Evol.* **25**, 450–458 (2010).
- 714 25. Wagner, A. The White-Knight Hypothesis, or Does the Environment Limit Innovations? *Trends*  
715 *Ecol. Evol.* **32**, 131–140 (2017).
- 716 26. de Visser, J. A. G. M. *et al.* Perspective: evolution and detection of genetic robustness. *Evolution*  
717 **57**, 1959–1972 (2003).
- 718 27. Landry, C. R., Lemos, B., Rifkin, S. A., Dickinson, W. J. & Hartl, D. L. Genetic Properties Influencing  
719 the Evolvability of Gene Expression. *Science* **317**, 118–121 (2007).
- 720 28. Lehner, B. Genes confer similar robustness to environmental, stochastic, and genetic  
721 perturbations in yeast. *PLoS One* **5**, e9035 (2010).
- 722 29. Siegal, M. L. & Leu, J.-Y. On the Nature and Evolutionary Impact of Phenotypic Robustness  
723 Mechanisms. *Annu. Rev. Ecol. Evol. Syst.* **45**, 495–517 (2014).
- 724 30. Paaby, A. B. & Rockman, M. V. Cryptic genetic variation: evolution’s hidden substrate. *Nat. Rev.*  
725 *Genet.* **15**, 247–258 (2014).
- 726 31. Hochachka, P. W. & Somero, G. N. *Biochemical Adaptation: Mechanism and Process in*  
727 *Physiological Evolution.* (Oxford University Press, 2002).
- 728 32. Sikosek, T. & Chan, H. S. Biophysics of protein evolution and evolutionary protein biophysics. *J. R.*  
729 *Soc. Interface* **11**, 20140419–20140419 (2014).
- 730 33. Echave, J. & Wilke, C. O. Biophysical models of protein evolution: understanding the patterns of  
731 evolutionary sequence divergence. *Annu. Rev. Biophys.* **46**, 85–103 (2017).

- 732 34. DePristo, M. A., Weinreich, D. M. & Hartl, D. L. Missense meanderings in sequence space: a  
733 biophysical view of protein evolution. *Nat. Rev. Genet.* **6**, 678–687 (2005).
- 734 35. Tokuriki, N. & Tawfik, D. S. Stability effects of mutations and protein evolvability. *Curr. Opin.*  
735 *Struct. Biol.* **19**, 596–604 (2009).
- 736 36. Bershtein, S., Serohijos, A. W. & Shakhnovich, E. I. Bridging the physical scales in evolutionary  
737 biology: from protein sequence space to fitness of organisms and populations. *Curr. Opin. Struct.*  
738 *Biol.* **42**, 31–40 (2017).
- 739 37. Huey, R. B. & Kingsolver, J. G. Evolution of thermal sensitivity of ectotherm performance. *Trends*  
740 *Ecol. Evol.* **4**, 131–135 (1989).
- 741 38. Gillooly, J. F., Charnov, E. L., West, G. B., Savage, V. M. & Brown, J. H. Effects of size and  
742 temperature on developmental time. *Nature* **417**, 70–73 (2002).
- 743 39. Brown, J. H., Gillooly, J. F., Allen, A. P., Savage, V. M. & West, G. B. Toward a Metabolic Theory of  
744 Ecology. *Ecology* **85**, 1771–1789 (2004).
- 745 40. Allen, A. P., Gillooly, J. F., Savage, V. M. & Brown, J. H. Kinetic effects of temperature on rates of  
746 genetic divergence and speciation. *Proc. Natl. Acad. Sci.* **103**, 9130–9135 (2006).
- 747 41. Dell, A. I., Pawar, S. & Savage, V. M. Systematic variation in the temperature dependence of  
748 physiological and ecological traits. *Proc. Natl. Acad. Sci.* **108**, 10591–10596 (2011).
- 749 42. Schramski, J. R., Dell, A. I., Grady, J. M., Sibly, R. M. & Brown, J. H. Metabolic theory predicts  
750 whole-ecosystem properties. *Proc. Natl. Acad. Sci.* **112**, 2617–2622 (2015).
- 751 43. Angilletta, M. J. *Thermal Adaptation: A Theoretical and Empirical Synthesis*. (OUP Oxford, 2009).
- 752 44. Schoolfield, R. M., Sharpe, P. J. H. & Magnuson, C. E. Non-linear regression of biological  
753 temperature-dependent rate models based on absolute reaction-rate theory. *J. Theor. Biol.* **88**,  
754 719–731 (1981).
- 755 45. Cornish-Bowden, A. Kinetics, Enzymes. in *Encyclopedia of Bioprocess Technology* (John Wiley &  
756 Sons, Inc., 2002). doi:10.1002/0471250589.ebt123

- 757 46. Chen, P. & Shakhnovich, E. I. Lethal Mutagenesis in Viruses and Bacteria. *Genetics* **183**, 639–650  
758 (2009).
- 759 47. Chen, P. & Shakhnovich, E. I. Thermal adaptation of viruses and bacteria. *Biophys. J.* **98**, 1109–  
760 1118 (2010).
- 761 48. Drummond, D. A. & Wilke, C. O. Mistranslation-Induced Protein Misfolding as a Dominant  
762 Constraint on Coding-Sequence Evolution. *Cell* **134**, 341–352 (2008).
- 763 49. Zeldovich, K. B., Chen, P. & Shakhnovich, E. I. Protein stability imposes limits on organism  
764 complexity and speed of molecular evolution. *Proc. Natl. Acad. Sci.* **104**, 16152–16157 (2007).
- 765 50. Tokuriki, N., Stricher, F., Serrano, L. & Tawfik, D. S. How protein stability and new functions trade  
766 off. *PLoS Comput. Biol.* **4**, e1000002 (2008).
- 767 51. Ghosh, K. & Dill, K. Cellular proteomes have broad distributions of protein stability. *Biophys. J.*  
768 **99**, 3996–4002 (2010).
- 769 52. Sawle, L. & Ghosh, K. How Do Thermophilic Proteins and Proteomes Withstand High  
770 Temperature? *Biophys. J.* **101**, 217–227 (2011).
- 771 53. DeLong, J. P. *et al.* The combined effects of reactant kinetics and enzyme stability explain the  
772 temperature dependence of metabolic rates. *Ecol. Evol.* **7**, 3940–3950 (2017).
- 773 54. Zhang, J. & Yang, J.-R. Determinants of the rate of protein sequence evolution. *Nat. Rev. Genet.*  
774 **16**, 409–420 (2015).
- 775 55. Rogell, B. *et al.* Sex-dependent evolution of life-history traits following adaptation to climate  
776 warming. *Funct. Ecol.* **28**, 469–478 (2014).
- 777 56. Berger, D., Stångberg, J., Grieshop, K., Martinossi-Alilibert, I. & Arnqvist, G. Temperature effects  
778 on life-history trade-offs, germline maintenance and mutation rate under simulated climate  
779 warming. *Proc R Soc B* **284**, 20171721 (2017).
- 780 57. Bershtein, S., Segal, M., Bekerman, R., Tokuriki, N. & Tawfik, D. S. Robustness–epistasis link  
781 shapes the fitness landscape of a randomly drifting protein. *Nature* **444**, 929–932 (2006).

- 782 58. Fifth Assessment Report - Climate Change 2013. Available at:  
783 <https://www.ipcc.ch/report/ar5/wg1/>. (Accessed: 12th September 2018)
- 784 59. Walters, R. J., Blanckenhorn, W. U. & Berger, D. Forecasting extinction risk of ectotherms under  
785 climate warming: an evolutionary perspective. *Funct. Ecol.* **26**, 1324–1338 (2012).
- 786 60. Bomblies Kirsten, Higgins James D. & Yant Levi. Meiosis evolves: adaptation to external and  
787 internal environments. *New Phytol.* **208**, 306–323 (2015).
- 788 61. Lloyd, A., Morgan, C., Franklin, F. C. H. & Bomblies, K. Plasticity of Meiotic Recombination Rates  
789 in Response to Temperature in Arabidopsis. *Genetics* **208**, 1409–1420 (2018).
- 790 62. Jablonski, D., Roy, K. & Valentine, J. W. Out of the Tropics: Evolutionary Dynamics of the  
791 Latitudinal Diversity Gradient. *Science* **314**, 102–106 (2006).
- 792 63. Tittensor, D. P. *et al.* Global patterns and predictors of marine biodiversity across taxa. *Nature*  
793 **466**, 1098–1101 (2010).
- 794 64. Hoffmann, A. A., Sgrò, C. M. & Kristensen, T. N. Revisiting Adaptive Potential, Population Size,  
795 and Conservation. *Trends Ecol. Evol.* **32**, 506–517 (2017).
- 796 65. Deutsch, C. A. *et al.* Impacts of climate warming on terrestrial ectotherms across latitude. *Proc.*  
797 *Natl. Acad. Sci.* **105**, 6668–6672 (2008).
- 798 66. Hoffmann, A. A. & Sgrò, C. M. Climate change and evolutionary adaptation. *Nature* **470**, 479–485  
799 (2011).
- 800 67. Kellermann, V., van Heerwaarden, B., Sgrò, C. M. & Hoffmann, A. A. Fundamental evolutionary  
801 limits in ecological traits drive *Drosophila* species distributions. *Science* **325**, 1244–1246 (2009).
- 802 68. Soskine, M. & Tawfik, D. S. Mutational effects and the evolution of new protein functions. *Nat.*  
803 *Rev. Genet.* **11**, 572–582 (2010).
- 804 69. Wagner, A. Neutralism and selectionism: a network-based reconciliation. *Nat. Rev. Genet.* **9**,  
805 965–974 (2008).
- 806 70. Bloom, J. D., Labthavikul, S. T., Otey, C. R. & Arnold, F. H. Protein stability promotes evolvability.  
807 *Proc. Natl. Acad. Sci.* **103**, 5869–5874 (2006).

- 808 71. Sabath, N., Ferrada, E., Barve, A. & Wagner, A. Growth Temperature and Genome Size in Bacteria  
809 Are Negatively Correlated, Suggesting Genomic Streamlining During Thermal Adaptation.  
810 *Genome Biol. Evol.* **5**, 966–977 (2013).
- 811 72. Drake, J. W. Avoiding dangerous missense: thermophiles display especially low mutation rates.  
812 *PLoS Genet.* **5**, e1000520 (2009).
- 813 73. Van Nimwegen, E., Crutchfield, J. P. & Huynen, M. Neutral evolution of mutational robustness.  
814 *Proc. Natl. Acad. Sci.* **96**, 9716–9720 (1999).
- 815 74. Wagner, A. Distributed robustness versus redundancy as causes of mutational robustness.  
816 *BioEssays* **27**, 176–188 (2005).
- 817 75. Jones, A. G., Bürger, R. & Arnold, S. J. Epistasis and natural selection shape the mutational  
818 architecture of complex traits. *Nat. Commun.* **5**, 3709 (2014).
- 819 76. LaBar, T. & Adami, C. Evolution of drift robustness in small populations. *Nat. Commun.* **8**, 1012  
820 (2017).
- 821 77. Lynch, M. The frailty of adaptive hypotheses for the origins of organismal complexity. *Proc. Natl.*  
822 *Acad. Sci.* **104**, 8597–8604 (2007).
- 823 78. Rajon, E. & Masel, J. Evolution of molecular error rates and the consequences for evolvability.  
824 *Proc. Natl. Acad. Sci.* **108**, 1082–1087 (2011).
- 825 79. Sabater-Muñoz, B. *et al.* Fitness Trade-Offs Determine the Role of the Molecular Chaperonin  
826 GroEL in Buffering Mutations. *Mol. Biol. Evol.* **32**, 2681–2693 (2015).
- 827 80. Friedberg, E. C., Walker, G. C., Siede, W. & Wood, R. D. *DNA Repair and Mutagenesis*. (American  
828 Society for Microbiology Press, 2005).
- 829 81. Levins, R. *Evolution in Changing Environments: Some Theoretical Explorations*. (Princeton  
830 University Press, 1968).
- 831 82. Dandage, R. *et al.* Differential strengths of molecular determinants guide environment specific  
832 mutational fates. *PLOS Genet.* **14**, e1007419 (2018).

- 833 83. Caruso, C. M. *et al.* What are the environmental determinants of phenotypic selection? A meta-  
834 analysis of experimental studies. *Am. Nat.* **190**, 363–376 (2017).
- 835 84. Hoffmann, null & Merilä, null. Heritable variation and evolution under favourable and  
836 unfavourable conditions. *Trends Ecol. Evol.* **14**, 96–101 (1999).
- 837 85. Husby, A., Visser, M. E. & Kruuk, L. E. B. Speeding Up Microevolution: The Effects of Increasing  
838 Temperature on Selection and Genetic Variance in a Wild Bird Population. *PLoS Biol.* **9**, e1000585  
839 (2011).
- 840 86. Berger, D., Postma, E., Blanckenhorn, W. U. & Walters, R. J. QUANTITATIVE GENETIC  
841 DIVERGENCE AND STANDING GENETIC (CO)VARIANCE IN THERMAL REACTION NORMS ALONG  
842 LATITUDE: GENETICS OF THERMAL REACTION NORM DIFFERENTIATION. *Evolution* **67**, 2385–2399  
843 (2013).
- 844 87. Rowiński, P. K. & Rogell, B. Environmental stress correlates with increases in both genetic and  
845 residual variances: A meta-analysis of animal studies. *Evolution* **71**, 1339–1351 (2017).
- 846 88. Siepielski, A. M. *et al.* Precipitation drives global variation in natural selection. *Science* **355**, 959–  
847 962 (2017).
- 848 89. Berger David, Bauerfeind Stephanie Sandra, Blanckenhorn Wolf Ulrich & Schäfer Martin Andreas.  
849 High temperatures reveal cryptic genetic variation in a polymorphic female sperm storage organ.  
850 *Evolution* **65**, 2830–2842 (2011).
- 851 90. Allen Orr, H. ADAPTATION AND THE COST OF COMPLEXITY. *Evolution* **54**, 13 (2000).
- 852 91. Wagner, G. P. *et al.* Pleiotropic scaling of gene effects and the ‘cost of complexity’. *Nature* **452**,  
853 470–472 (2008).
- 854 92. Charlesworth, B. Effective population size and patterns of molecular evolution and variation.  
855 *Nat. Rev. Genet.* **10**, 195–205 (2009).
- 856 93. Fox, C. W. Multiple Mating, Lifetime Fecundity and Female Mortality of the Bruchid Beetle,  
857 *Callosobruchus maculatus* (Coleoptera: Bruchidae). *Funct. Ecol.* **7**, 203–208 (1993).

- 858 94. Martinossi-Allibert, I., Arnqvist, G. & Berger, D. Sex-specific selection under environmental stress  
859 in seed beetles. *J. Evol. Biol.* **30**, 161–173 (2017).
- 860 95. Fricke, C. & Arnqvist, G. RAPID ADAPTATION TO A NOVEL HOST IN A SEED BEETLE (  
861 *CALLOSOBRUCHUS MACULATUS*): THE ROLE OF SEXUAL SELECTION: ADAPTATION AND SEXUAL  
862 SELECTION. *Evolution* **61**, 440–454 (2007).
- 863 96. Bates, D., Mächler, M., Bolker, B. & Walker, S. Fitting Linear Mixed-Effects Models using lme4.  
864 *ArXiv14065823 Stat* (2014).
- 865 97. Daly, M. J. Death by protein damage in irradiated cells. *DNA Repair* **11**, 12–21 (2012).
- 866 98. Shabalina, S. A., Yampolsky, L. Y. & Kondrashov, A. S. Rapid decline of fitness in panmictic  
867 populations of *Drosophila melanogaster* maintained under relaxed natural selection. *Proc. Natl.*  
868 *Acad. Sci.* **94**, 13034–13039 (1997).
- 869 99. Baer, C. F. *et al.* Cumulative Effects of Spontaneous Mutations for Fitness in *Caenorhabditis*: Role  
870 of Genotype, Environment and Stress. *Genetics* **174**, 1387–1395 (2006).
- 871 100. Fieller, E. C. Some Problems in Interval Estimation. *J. R. Stat. Soc. Ser. B Methodol.* **16**,  
872 175–185 (1954).
- 873
- 874
- 875

## 876 **Acknowledgements**

877 We thank C. Ruffler, R. Dandage, A. Husby, B. Rogell and three anonymous reviewers for  
878 valuable input on earlier drafts. We are also grateful to B. Stenerlöv for providing access to  
879 the radiation source, and to L. Hallsson, M. Björklund and AA Maklakov for passing on the  
880 beetle lines. This work was supported by grant no. 2015-05223 from the Swedish Research  
881 Council (VR) to DB.

882

## 883 **Author Contributions**

884 DB performed the experiments on seed beetles together with JS. RJW and DB performed the  
885 modelling and DB and JB performed the meta-analysis. DB wrote the manuscript with  
886 considerable input from RJW. All authors commented on manuscript drafts.

887

## 888 **Competing Interests**

889 The authors have no competing interests to report

890
